# Supplementary material for: Fabrication of strawberry-like Au@CeO2 nanoparticles with enhanced catalytic activity by assembly of block copolymer composite micelles
Source: Royal Society of Chemistry journal article supplement (doi:10.1039/c6ra25500k), 2017-01-01
Supplement: c6ra25500k1.pdf [file c6ra25500k1.pdf]

## Fabrication of Strawberry-like Au@CeO<sub>2</sub> Nanoparticles with Enhanced Catalytic Activity by Assembly of Block Copolymer Composite Micelles

Na Li,<sup>a</sup> Yapei Jiao,<sup>a</sup> Huan Yu,<sup>a</sup> Wenting Li,<sup>a</sup> Jiaxu Zhao,<sup>a</sup> Xue Li,<sup>a,\*</sup> Xiaokai Zhang<sup>b</sup>

### *Supporting Information*

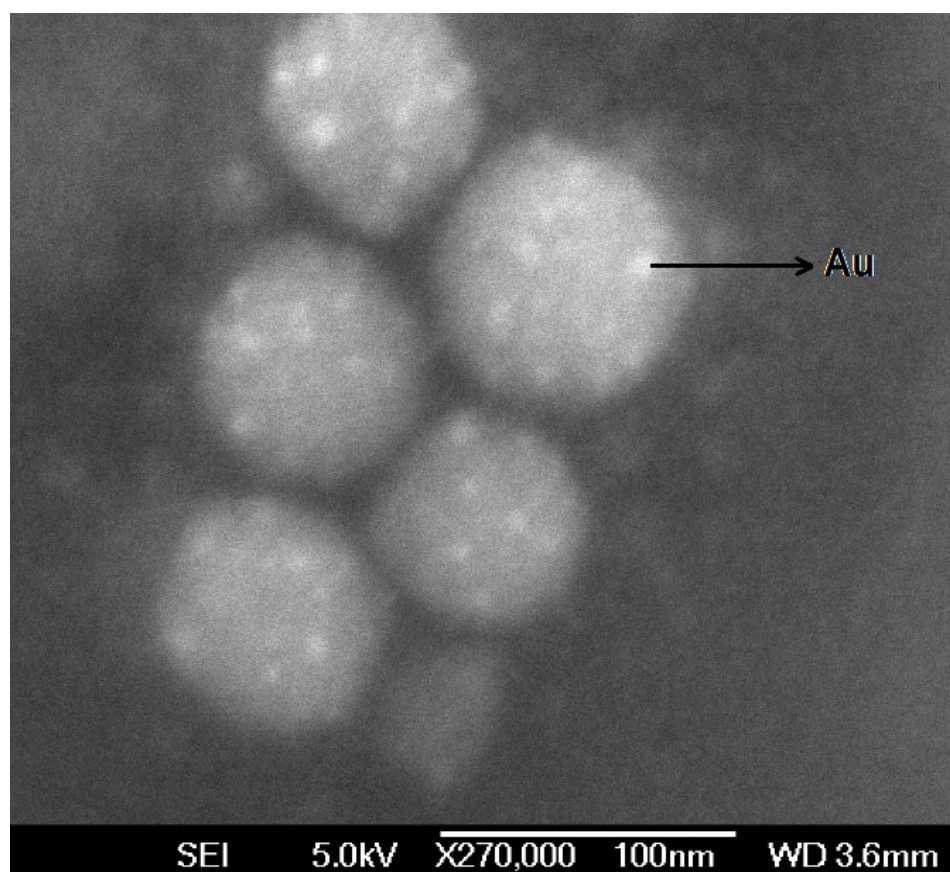

Fig. S1. SEM image of the strawberry-like Au@CeO<sub>2</sub> NPs (reactant ratio: Ce(NO<sub>3</sub>)<sub>3</sub>/HAuCl<sub>4</sub>=10/1).

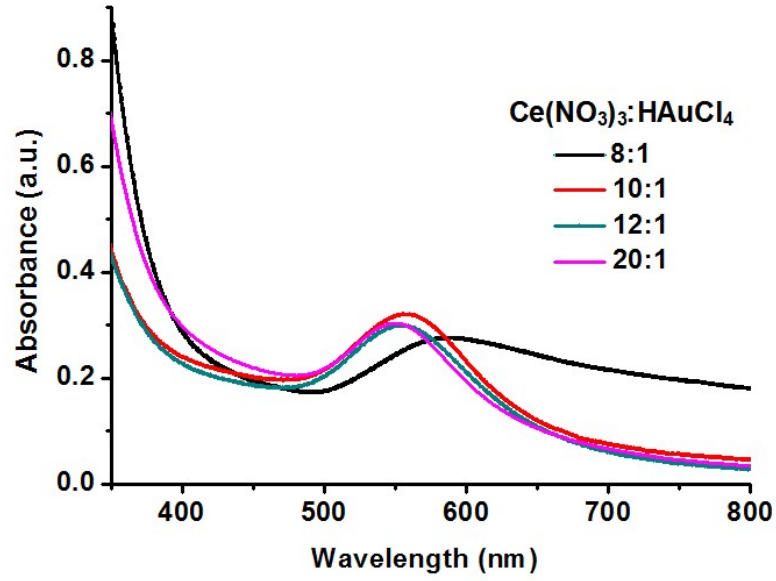

Fig. S2. UV-vis spectra of the Au@CeO<sub>2</sub> NPs prepared with different reactant ratio of Ce(NO<sub>3</sub>)<sub>3</sub>/HAuCl<sub>4</sub>. If Ce(NO<sub>3</sub>)<sub>3</sub>/HAuCl<sub>4</sub> = 8/1, the SPR peak is at about 590 nm due to the large size of the Au NPs. If Ce(NO<sub>3</sub>)<sub>3</sub>/HAuCl<sub>4</sub> = 10/1, 12/1 to 20/1, the SPR peak positions are 560, 554 and 550 nm, respectively.

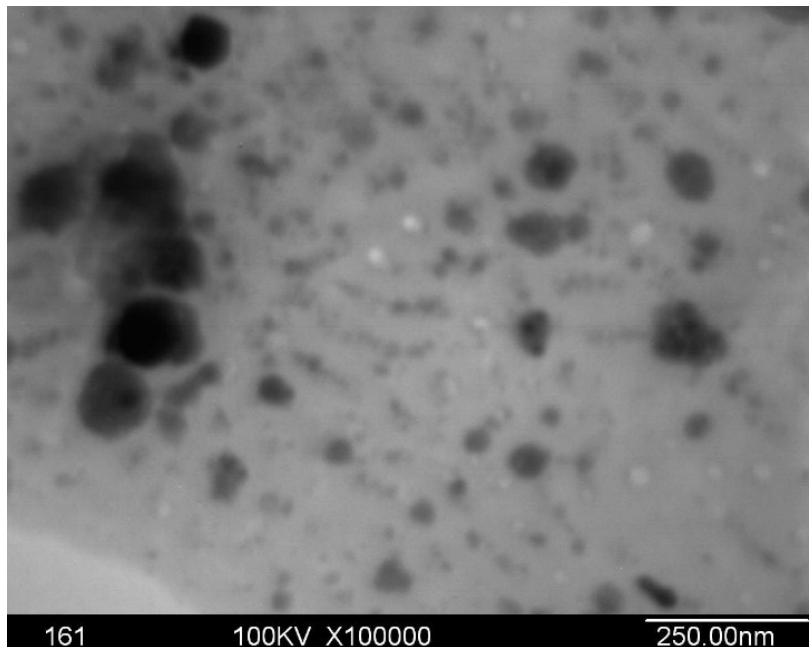

Fig. S3. TEM image of Au@CeO<sub>2</sub> NPs prepared with reactant ratio of Ce(NO<sub>3</sub>)<sub>3</sub>/HAuCl<sub>4</sub> = 8/1. large Au NPs are formed.

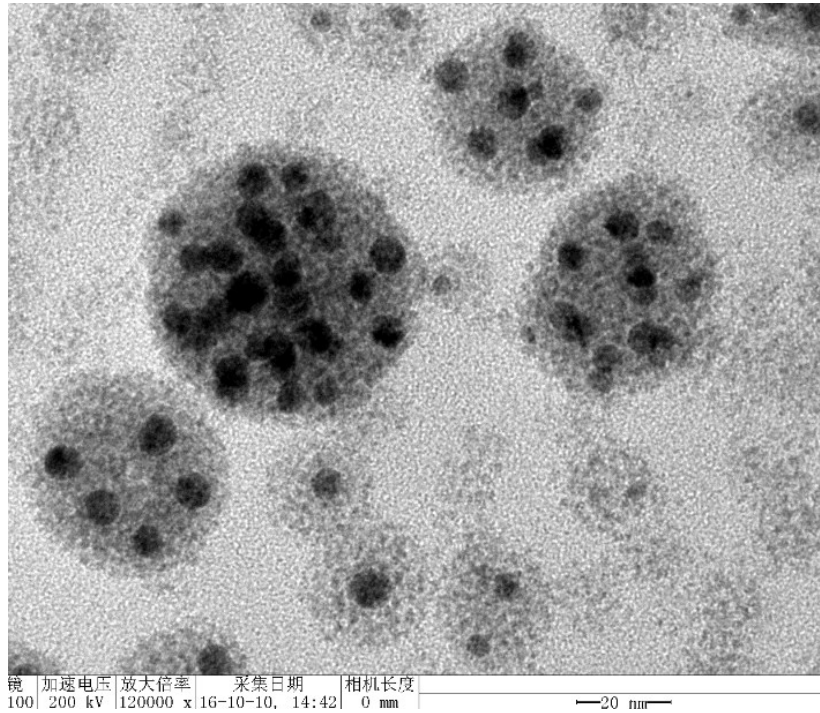

Fig. S4. TEM image of Au@CeO<sub>2</sub> NPs prepared with reactant ratio of Ce(NO<sub>3</sub>)<sub>3</sub>/HAuCl<sub>4</sub> = 12/1. Strawberry-like Au@CeO<sub>2</sub> can be formed.
